# Supplementary material for: Measurement Properties of the Dutch Multifactor Fatigue Scale in Early and Late Rehabilitation of Acquired Brain Injury in Denmark
Source: MDPI journal article supplement (doi:10.3390/jcm12072587), 2023-03-29
Supplement: s1 [file s1]

## ONLINE SUPPLEMENTARY MATERIAL

### Measurement Properties of the Dutch Multifactor Fatigue Scale in Early and Late Rehabilitation of Acquired Brain Injury in Denmark

|                                                |    |
|------------------------------------------------|----|
| Correlation matrices.....                      | 1  |
| Item descriptive statistics.....               | 4  |
| Standardized factor loadings.....              | 9  |
| Post hoc measurement invariance analyzes ..... | 12 |

#### **Correlation matrices**

Summary data (inter-item correlation matrices) of the full sample ( $N = 149$ ) for subscales of the Dutch Multifactor Fatigue Scale (DMFS) are provided in Table S1–S5. Correlations were calculated using the polychoric correlation coefficient (using the *psych* package [47]), as appropriate for ordinal data.

Table S1. Impact of Fatigue: Inter-Item Correlations (Polychoric)

| Item | 1   | 6   | 13  | 20  | 22  | 24  | 26  | 29  | 33  | 35  | 38 |
|------|-----|-----|-----|-----|-----|-----|-----|-----|-----|-----|----|
| 1    | 1   |     |     |     |     |     |     |     |     |     |    |
| 6    | .58 | 1   |     |     |     |     |     |     |     |     |    |
| 13   | .59 | .54 | 1   |     |     |     |     |     |     |     |    |
| 20   | .59 | .46 | .45 | 1   |     |     |     |     |     |     |    |
| 22   | .52 | .55 | .51 | .47 | 1   |     |     |     |     |     |    |
| 24   | .14 | .23 | .17 | .32 | .23 | 1   |     |     |     |     |    |
| 26   | .58 | .62 | .55 | .53 | .60 | .34 | 1   |     |     |     |    |
| 29   | .47 | .59 | .33 | .47 | .49 | .10 | .50 | 1   |     |     |    |
| 33   | .66 | .66 | .49 | .55 | .58 | .31 | .61 | .52 | 1   |     |    |
| 35   | .39 | .51 | .44 | .40 | .49 | .39 | .52 | .31 | .63 | 1   |    |
| 38   | .53 | .63 | .46 | .50 | .57 | .15 | .66 | .60 | .74 | .46 | 1  |

Table S2. Signs and Direct Consequences of Fatigue: Inter-Item Correlations (Polychoric)

| Item | 4   | 7   | 11  | 15  | 19  | 21  | 23  | 28  | 31 |
|------|-----|-----|-----|-----|-----|-----|-----|-----|----|
| 4    | 1   |     |     |     |     |     |     |     |    |
| 7    | .37 | 1   |     |     |     |     |     |     |    |
| 11   | .35 | .27 | 1   |     |     |     |     |     |    |
| 15   | .46 | .24 | .40 | 1   |     |     |     |     |    |
| 19   | .13 | .29 | .25 | .17 | 1   |     |     |     |    |
| 21   | .35 | .47 | .29 | .35 | .32 | 1   |     |     |    |
| 23   | .19 | .31 | .21 | .27 | .20 | .34 | 1   |     |    |
| 28   | .27 | .37 | .14 | .25 | .30 | .56 | .32 | 1   |    |
| 31   | .40 | .46 | .48 | .32 | .40 | .38 | .30 | .48 | 1  |

Table S3. Mental Fatigue: Inter-Item Correlations (Polychoric)

| Item | 3   | 10  | 17  | 27  | 32  | 34  | 37 |
|------|-----|-----|-----|-----|-----|-----|----|
| 3    | 1   |     |     |     |     |     |    |
| 10   | .25 | 1   |     |     |     |     |    |
| 17   | .31 | .45 | 1   |     |     |     |    |
| 27   | .39 | .41 | .58 | 1   |     |     |    |
| 32   | .21 | .39 | .45 | .65 | 1   |     |    |
| 34   | .34 | .42 | .52 | .69 | .51 | 1   |    |
| 37   | .46 | .51 | .59 | .59 | .42 | .51 | 1  |

Table S4. Physical Fatigue: Inter-Item Correlations (Polychoric)

| Item | 5   | 9   | 14  | 18  | 25  | 30 |
|------|-----|-----|-----|-----|-----|----|
| 5    | 1   |     |     |     |     |    |
| 9    | .70 | 1   |     |     |     |    |
| 14   | .31 | .40 | 1   |     |     |    |
| 18   | .31 | .31 | .09 | 1   |     |    |
| 25   | .27 | .27 | .37 | .18 | 1   |    |
| 30   | .40 | .38 | .50 | .38 | .40 | 1  |

Table S5. Coping with Fatigue: Inter-Item Correlations (Polychoric)

| Item | 2    | 8   | 12   | 16  | 36 |
|------|------|-----|------|-----|----|
| 2    | 1    |     |      |     |    |
| 8    | -.11 | 1   |      |     |    |
| 12   | .22  | .05 | 1    |     |    |
| 16   | .02  | .37 | -.10 | 1   |    |
| 36   | .20  | .40 | .10  | .36 | 1  |

### **Item descriptive statistics**

Descriptive statistics for items on the subscales of DMFS in the full sample are provided in Table S6. Figure S1 shows the item response distribution on all items by rehabilitation setting (community-based vs. sub-acute). For each item, all response categories were observed in both groups. Figure S2 provides monotonicity plots in the full sample, i.e., relationships between each item and the corrected total score.

Table S6. Item Descriptive Statistics on Dutch Multifactor Fatigue Scale in Acquired Brain Injury

| Item                                     |                         | Univariate statistics |          |           |             |               | Correlations                               |                                      |
|------------------------------------------|-------------------------|-----------------------|----------|-----------|-------------|---------------|--------------------------------------------|--------------------------------------|
| no.                                      | Content,<br>abbreviated | <i>n</i>              | <i>M</i> | <i>SD</i> | Floor,<br>% | Ceiling,<br>% | Inter-item,<br>range <i>r<sub>pc</sub></i> | Item-total,<br><i>r<sub>ps</sub></i> |
| Impact of Fatigue                        |                         |                       |          |           |             |               |                                            |                                      |
| 1                                        | Often tired             | 149                   | 4.17     | 1.08      | 4.7         | 49.7          | .14 to .66                                 | .74                                  |
| 6                                        | Do what I want          | 149                   | 3.73     | 1.39      | 11.4        | 40.3          | .23 to .66                                 | .77                                  |
| 13                                       | Overcome                | 149                   | 3.86     | 1.38      | 12.1        | 45.0          | .17 to .59                                 | .62                                  |
| 20                                       | Tired every day         | 148                   | 4.05     | 1.21      | 6.1         | 48.6          | .32 to .59                                 | .65                                  |
| 22 <sup>a</sup>                          | Easily get over         | 149                   | 3.09     | 1.38      | 14.1        | 21.5          | .23 to .60                                 | .68                                  |
| 24 <sup>a</sup>                          | Don't need rest         | 148                   | 4.00     | 1.35      | 10.8        | 52.0          | .10 to .39                                 | .27                                  |
| 26                                       | Suffer                  | 149                   | 2.91     | 1.59      | 29.5        | 24.8          | .34 to .66                                 | .76                                  |
| 29                                       | Serious problem         | 149                   | 3.26     | 1.53      | 21.5        | 29.5          | .10 to .60                                 | .59                                  |
| 33                                       | Affects life            | 149                   | 3.26     | 1.53      | 22.8        | 28.2          | .31 to .74                                 | .81                                  |
| 35                                       | Can't go further        | 149                   | 3.61     | 1.42      | 12.1        | 37.6          | .31 to .63                                 | .60                                  |
| 38                                       | Suffer terribly         | 149                   | 2.68     | 1.47      | 30.2        | 16.1          | .15 to .74                                 | .73                                  |
| Mean                                     |                         | -                     | 3.51     | 1.39      | -           | -             | .48                                        | .66                                  |
| Signs and Direct Consequences of Fatigue |                         |                       |          |           |             |               |                                            |                                      |
| 4                                        | In the afternoon        | 149                   | 4.06     | 1.21      | 5.4         | 51.7          | .13 to .46                                 | .50                                  |
| 7                                        | Emotional issues        | 149                   | 3.09     | 1.43      | 19.5        | 22.8          | .24 to .47                                 | .54                                  |
| 11 <sup>a</sup>                          | Recover easily          | 149                   | 3.19     | 1.40      | 14.1        | 24.8          | .14 to .48                                 | .44                                  |
| 15                                       | Others notice           | 149                   | 3.44     | 1.35      | 12.1        | 26.2          | .17 to .46                                 | .46                                  |
| 19                                       | Headache                | 149                   | 2.40     | 1.53      | 45.0        | 15.4          | .13 to .40                                 | .40                                  |
| 21                                       | React emotionally       | 149                   | 3.57     | 1.38      | 12.8        | 33.6          | .29 to .56                                 | .58                                  |
| 23                                       | Let thoughts go         | 149                   | 3.19     | 1.42      | 18.1        | 23.5          | .19 to .34                                 | .40                                  |
| 28                                       | Regret things said      | 149                   | 2.53     | 1.48      | 38.9        | 12.8          | .14 to .56                                 | .51                                  |
| 31                                       | Bother next day         | 149                   | 3.40     | 1.48      | 16.8        | 32.2          | .30 to .48                                 | .62                                  |
| Mean                                     |                         | -                     | 3.21     | 1.41      | -           | -             | .32                                        | .49                                  |
| Mental Fatigue                           |                         |                       |          |           |             |               |                                            |                                      |
| 3 <sup>a</sup>                           | Conversations           | 149                   | 2.69     | 1.31      | 24.2        | 8.1           | .21 to .46                                 | .39                                  |
| 10                                       | Thinking                | 149                   | 3.40     | 1.39      | 14.1        | 26.2          | .25 to .51                                 | .51                                  |

| Item                |                         | Univariate statistics |          |           |             |               | Correlations                               |                                      |
|---------------------|-------------------------|-----------------------|----------|-----------|-------------|---------------|--------------------------------------------|--------------------------------------|
| no.                 | Content,<br>abbreviated | <i>n</i>              | <i>M</i> | <i>SD</i> | Floor,<br>% | Ceiling,<br>% | Inter-item,<br>range <i>r<sub>pc</sub></i> | Item-total,<br><i>r<sub>ps</sub></i> |
| 17                  | Stimulation             | 149                   | 4.05     | 1.25      | 8.1         | 51.0          | .31 to .59                                 | .66                                  |
| 27                  | Concentrating           | 148                   | 4.03     | 1.19      | 4.7         | 47.3          | .39 to .69                                 | .78                                  |
| 32                  | Make mistakes           | 149                   | 3.79     | 1.25      | 8.1         | 36.9          | .21 to .65                                 | .57                                  |
| 34                  | Complaints              | 149                   | 3.94     | 1.31      | 9.4         | 46.3          | .34 to .69                                 | .67                                  |
| 37                  | Cannot think            | 149                   | 3.20     | 1.50      | 19.5        | 28.2          | .42 to .59                                 | .67                                  |
| Mean                |                         | -                     | 3.59     | 1.31      | -           | -             | .46                                        | .61                                  |
| Physical Fatigue    |                         |                       |          |           |             |               |                                            |                                      |
| 5 <sup>a</sup>      | Physically fit          | 149                   | 2.79     | 1.36      | 22.8        | 13.4          | .27 to .70                                 | .56                                  |
| 9 <sup>a</sup>      | Good condition          | 149                   | 2.63     | 1.38      | 28.2        | 12.1          | .27 to .70                                 | .58                                  |
| 14 <sup>a</sup>     | Wake up rested          | 149                   | 2.71     | 1.46      | 26.2        | 18.1          | .09 to .50                                 | .45                                  |
| 18                  | Physical exertion       | 148                   | 3.72     | 1.43      | 12.2        | 43.2          | .09 to .38                                 | .32                                  |
| 25                  | Body aches              | 149                   | 2.13     | 1.44      | 51.7        | 11.4          | .18 to .40                                 | .40                                  |
| 30                  | Little energy           | 149                   | 3.37     | 1.41      | 14.8        | 28.2          | .38 to .50                                 | .57                                  |
| Mean                |                         | -                     | 2.89     | 1.41      | -           | -             | .35                                        | .48                                  |
| Coping with Fatigue |                         |                       |          |           |             |               |                                            |                                      |
| 2 <sup>a</sup>      | Plan rest               | 149                   | 2.79     | 1.43      | 24.2        | 17.4          | -.11 to .22                                | .14                                  |
| 8                   | Get tired out           | 148                   | 2.84     | 1.43      | 24.3        | 16.9          | -.11 to .40                                | .30                                  |
| 12                  | Finish doings           | 149                   | 3.56     | 1.29      | 9.4         | 28.2          | -.10 to .22                                | .14                                  |
| 16 <sup>a</sup>     | Avoid overtired         | 149                   | 2.91     | 1.33      | 16.8        | 14.8          | -.10 to .37                                | .28                                  |
| 36                  | Get overtired           | 149                   | 3.21     | 1.47      | 18.8        | 25.5          | .10 to .40                                 | .47                                  |
| Mean                |                         | -                     | 3.06     | 1.39      | -           | -             | .15                                        | .27                                  |

*Note.* Analyses were conducted in the full sample ( $N = 149$ ).  $r_{pc}$  = polychoric correlation coefficient.  $r_{ps}$  = polyserial correlation coefficient.

<sup>a</sup> The item is reverse keyed, i.e. worded in positive terms, and was reverse coded prior to analyses.

Figure S1. Item Response Distribution on the Dutch Multifactor Fatigue Scale by Rehabilitation Setting

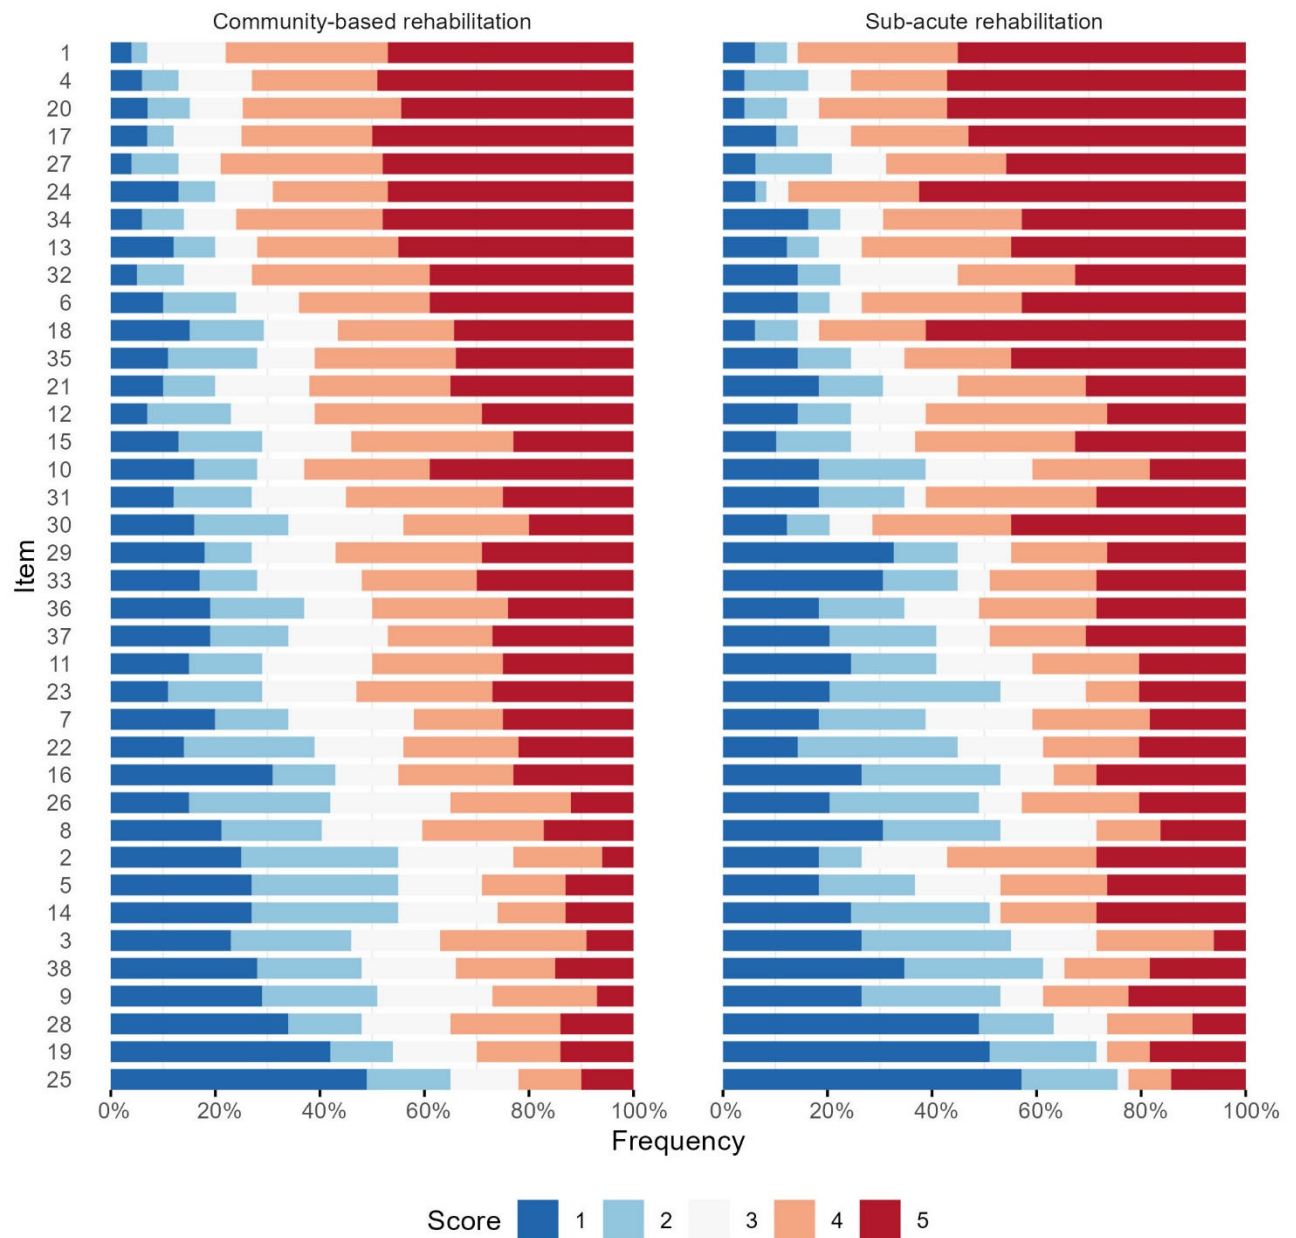

*Note.* Reverse keyed items, i.e. negatively worded items, were reverse coded prior to analysis.

Figure S2. Monotonicity Plots in the Full Sample

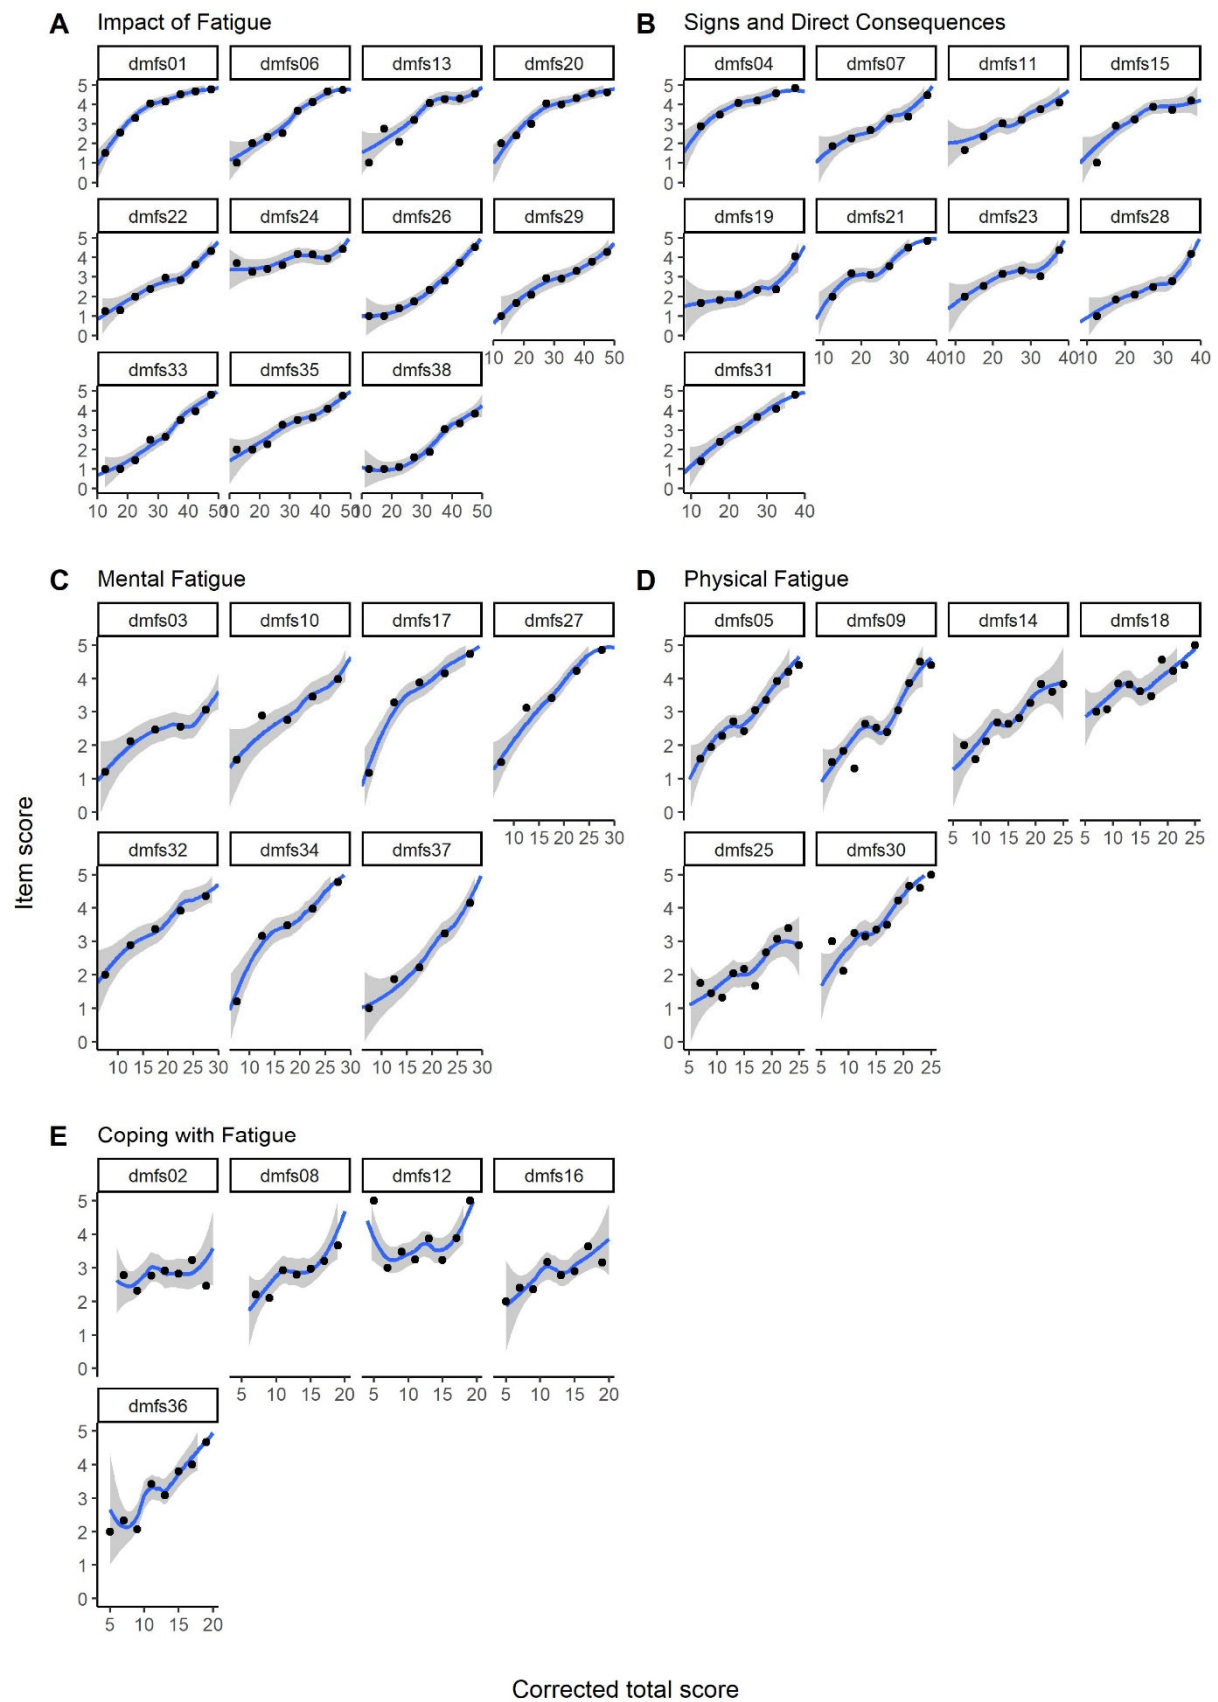



*Note.* The corrected total score (corrected for item overlap) was used as a proxy for the latent variable. Points represent binned means. Smooth curves were calculated using locally estimated scatterplot smoothing (loess). Grey areas display the 95% confidence interval.

### **Standardized factor loadings**

Table S7 reports standardized factor loadings of measurement models in the full sample, and Table S8 reports standardized factor loadings of the multi-group factor models that were fitted in measurement invariance testing. Threshold estimates are not reported.

Table S7. Standardized Factor Loadings in Full Sample ( $N = 149$ )

| Item                                     | Est   | <i>SE</i> | <i>z</i> | <i>p</i> |
|------------------------------------------|-------|-----------|----------|----------|
| Impact of Fatigue                        |       |           |          |          |
| 1                                        | 0.75  | 0.05      | 15.51    | < .001   |
| 6                                        | 0.78  | 0.04      | 19.12    | < .001   |
| 13                                       | 0.66  | 0.06      | 11.44    | < .001   |
| 20                                       | 0.67  | 0.06      | 12.01    | < .001   |
| 22                                       | 0.73  | 0.04      | 17.08    | < .001   |
| 24                                       | 0.33  | 0.08      | 3.99     | < .001   |
| 26                                       | 0.79  | 0.04      | 20.40    | < .001   |
| 29                                       | 0.66  | 0.05      | 12.83    | < .001   |
| 33                                       | 0.86  | 0.03      | 27.83    | < .001   |
| 35                                       | 0.65  | 0.06      | 11.19    | < .001   |
| 38                                       | 0.81  | 0.03      | 24.46    | < .001   |
| Signs and Direct Consequences of Fatigue |       |           |          |          |
| 4                                        | 0.57  | 0.08      | 7.45     | < .001   |
| 7                                        | 0.62  | 0.06      | 10.44    | < .001   |
| 11                                       | 0.53  | 0.07      | 7.95     | < .001   |
| 15                                       | 0.53  | 0.07      | 7.90     | < .001   |
| 19                                       | 0.45  | 0.08      | 5.46     | < .001   |
| 21                                       | 0.69  | 0.05      | 14.28    | < .001   |
| 23                                       | 0.46  | 0.07      | 6.58     | < .001   |
| 28                                       | 0.63  | 0.06      | 10.52    | < .001   |
| 31                                       | 0.72  | 0.05      | 14.27    | < .001   |
| Mental Fatigue                           |       |           |          |          |
| 3                                        | 0.47  | 0.07      | 6.68     | < .001   |
| 10                                       | 0.57  | 0.06      | 9.75     | < .001   |
| 17                                       | 0.71  | 0.05      | 12.91    | < .001   |
| 27                                       | 0.86  | 0.03      | 28.89    | < .001   |
| 32                                       | 0.68  | 0.05      | 13.76    | < .001   |
| 34                                       | 0.76  | 0.04      | 17.75    | < .001   |
| 37                                       | 0.73  | 0.05      | 15.00    | < .001   |
| Physical Fatigue                         |       |           |          |          |
| 5                                        | 0.79  | 0.05      | 17.37    | < .001   |
| 9                                        | 0.80  | 0.05      | 16.26    | < .001   |
| 14                                       | 0.57  | 0.06      | 8.86     | < .001   |
| 18                                       | 0.41  | 0.08      | 5.22     | < .001   |
| 25                                       | 0.45  | 0.09      | 5.26     | < .001   |
| 30                                       | 0.63  | 0.06      | 11.02    | < .001   |
| Coping with Fatigue                      |       |           |          |          |
| 2                                        | -0.08 | 0.10      | -0.85    | .395     |
| 8                                        | -0.61 | 0.08      | -7.60    | < .001   |
| 12                                       | -0.05 | 0.09      | -0.61    | .544     |
| 16                                       | -0.56 | 0.08      | -6.95    | < .001   |
| 36                                       | -0.67 | 0.09      | -7.13    | < .001   |

Table S8. Standardized Factor Loadings Across Rehabilitation Settings

| Item                                     | Community-based<br>( <i>n</i> = 100) |           | Equality constrained |           | Sub-acute<br>( <i>n</i> = 49) |           |
|------------------------------------------|--------------------------------------|-----------|----------------------|-----------|-------------------------------|-----------|
|                                          | Est                                  | <i>SE</i> | Est                  | <i>SE</i> | Est                           | <i>SE</i> |
| Impact of Fatigue–10 (w/o Item 24)       |                                      |           |                      |           |                               |           |
| 1                                        |                                      |           | .77***               | .05       |                               |           |
| 6                                        |                                      |           | .85***               | .04       |                               |           |
| 13                                       |                                      |           | .66***               | .07       |                               |           |
| 20                                       |                                      |           | .71***               | .06       |                               |           |
| 22                                       |                                      |           | .74***               | .05       |                               |           |
| 26                                       |                                      |           | .84***               | .04       |                               |           |
| 29                                       |                                      |           | .70***               | .05       |                               |           |
| 33                                       |                                      |           | .89***               | .03       |                               |           |
| 35                                       |                                      |           | .68***               | .06       |                               |           |
| 38                                       |                                      |           | .84***               | .03       |                               |           |
| Signs and Direct Consequences of Fatigue |                                      |           |                      |           |                               |           |
| 4                                        |                                      |           | .57***               | .08       |                               |           |
| 7                                        | .70***                               | .07       |                      |           | .30**                         | .10       |
| 11                                       |                                      |           | .53***               | .08       |                               |           |
| 15                                       |                                      |           | .52***               | .07       |                               |           |
| 19                                       |                                      |           | .46***               | .09       |                               |           |
| 21                                       |                                      |           | .74***               | .05       |                               |           |
| 23                                       |                                      |           | .47***               | .08       |                               |           |
| 28                                       |                                      |           | .66***               | .07       |                               |           |
| 31                                       |                                      |           | .65***               | .06       |                               |           |
| Mental Fatigue                           |                                      |           |                      |           |                               |           |
| 3                                        | .58***                               | .07       |                      |           | .19                           | .12       |
| 10                                       |                                      |           | .55***               | .07       |                               |           |
| 17                                       |                                      |           | .74***               | .06       |                               |           |
| 27                                       |                                      |           | .86***               | .04       |                               |           |
| 32                                       |                                      |           | .72***               | .05       |                               |           |
| 34                                       |                                      |           | .77***               | .05       |                               |           |
| 37                                       |                                      |           | .75***               | .05       |                               |           |

*Note.* Parameter estimates were derived from the final model in tests of measurement invariance (see Table 3).

\*  $p < .05$ . \*\*  $p < .01$ . \*\*\*  $p < .001$ .

---

**Post hoc measurement invariance analyzes**

Eleven items included categories with only one or two observations (of which all cases were among inpatients). Analysis was rerun with these categories collapsed to examine effects of low frequency cells on the estimation of parameters. Collapsing categories resulted in slight changes in fit statistics without substantial interpretational consequences.
